# Supplementary material for: Graphene-coated copper-doped ZnO quantum dots for sensitive photoelectrochemical bioanalysis of thrombin triggered by DNA nanoflowers
Source: Royal Society of Chemistry journal article supplement (doi:10.1039/d1tb01465j), 2021-01-01
Supplement: d1tb01465j1.pdf [file d1tb01465j1.pdf]

## **ELECTRONIC SUPPLEMENTARY INFORMATION (ESI)**

### **Graphene-coated copper-doped ZnO quantum dots for sensitive photoelectrochemical bioanalysis of thrombin triggered by DNA nanoflowers**

Yuxuan Li, Wenqing Wang, Hexiang Gong, Jianhui Xu, Zhichao Yu, Qiaohua Wei\* and Dianping Tang\*

Key Laboratory for Analytical Science of Food Safety and Biology (MOE & Fujian Province), Fujian Provincial Key Laboratory of Electrochemical Energy Storage Materials, State Key Laboratory of Photocatalysis on Energy and Environment, Department of Chemistry, Fuzhou University, Fuzhou 350108, P.R. China.

#### **CORRESPONDING AUTHOR INFORMATION**

Phone: +86-591-2286 6125; fax: +86-591-2286 6135; e-mails: qhw76@fzu.edu.cn (Q. Wei); dianping.tang@fzu.edu.cn (D. Tang).

## TABLE OF CONTENTS

|                                                                                                              |    |
|--------------------------------------------------------------------------------------------------------------|----|
| Materials and reagents .....                                                                                 | S3 |
| Preparation of GO .....                                                                                      | S3 |
| Preparation of circular template DNA .....                                                                   | S4 |
| Preparation of GO <sub>x</sub> -DFs .....                                                                    | S4 |
| Preparation of Apt15-immobilized MMPs .....                                                                  | S4 |
| Figure S1: UV-Vis diffuse reflectance spectra of ZnO QDs and Cu <sub>0.3</sub> Zn <sub>0.7</sub> O QDs ..... | S5 |
| Figure S2: Schematic illustration of enzyme catalytic reaction in the GO <sub>x</sub> -DFs .....             | S5 |
| Figure S3: Optimization of experimental conditions .....                                                     | S6 |
| Table S1 .....                                                                                               | S6 |
| Table S2 .....                                                                                               | S7 |
| Reference .....                                                                                              | S7 |

## EXPERIMENTAL SECTION

### Chemical and reagent

T4 DNA ligase, exonuclease I (Exo I), Glucose oxidase (GOx), Horseradish Peroxidase (HRP), hydrogen peroxide (H<sub>2</sub>O<sub>2</sub>), phi29 DNA polymerase, and deoxynucleotides (dNTPs) were purchased from Sangon Biotechnology. Zinc acetate dehydrate[Zn(CH<sub>3</sub>COO)<sub>2</sub>·2H<sub>2</sub>O], N,N-Dimethylformamide, ethanol (DMF), Copper(II) acetate monohydrate [Cu(CH<sub>3</sub>COO)<sub>2</sub>·H<sub>2</sub>O], H<sub>2</sub>SO<sub>4</sub> (>95 %), HNO<sub>3</sub> (>95 %), Sodium nitrate (>99 %), 30 % (w/w) solution of H<sub>2</sub>O<sub>2</sub>, 37 % reagent grade HCl and KMnO<sub>4</sub> (99 %), Graphite powder, 2,2'-azino-bis (3-ethylbenzothiazoline-6-sulphonic acid) (ABTS) was purchased from Aladdin Reagent Co., Ltd. (Shanghai, China). Ultrapure water obtained from a Millipore water purification system was used in all runs (18.2 MΩ cm, Milli-Q). All oligonucleotide sequences and magnetic beads (MBs) were purchased from Sangon Biotechnology Co., Ltd. (Shanghai, China). The human serum samples were collected from normal human blood donated by Maida Community Health Service Station (Qingdao, China). A conventional three-electrode system consisting of a graphene-coated copper doped Zinc oxide-graphene oxide quantum dots-modified FTO working electrode (WE), a Pt-wire counter electrode (CE) and a saturated calomel electrode (SCE) as the reference electrode (RE). All determinations were measured at least three times.

These sequences are listed as follows (5'-3'):

Padlock probe: phosphate-AATATTATTCCAGCTGGCAGTCACCCCAACCTGCC  
CTACCACGGACTGACTGCACCTTGAACGCTTATTATGATT

Primer: CTGGAATAATATT AATCATAATAAGC

Apt15: GGT TGG TGT GGT TGG-biotin

### Preparation of GO

GO was prepared by the modified Hummers' method. In a typical reaction, 1.0 g graphite, 1.0 g sodium nitrate (NaNO<sub>3</sub>) and 46 mL Sulphuric acid were mixed in a flask. The mixture was stirred for 4 h in an ice bath. Subsequently, 6.0 g KMnO<sub>4</sub> was added to the solution drop by drop with stirring, and then stirred in the ice bath for 2 h. 92 mL ultrapure water was added to the reaction flask, and

then stirred at 35 °C for 1 h. The solution maintained at 98 °C for 2 h before cooling naturally to room temperature. After adding 200 mL water and stirring for 1 h, 20 mL of 30% (w/w) H<sub>2</sub>O<sub>2</sub> was added to the solution stirred for 1 h. The golden-brown solution was centrifuged and washed once with 5 mL HCl (36.5-38%) and then with water until the pH of the solution reached 6. The resulting product was dried in an oven overnight at 50 °C.

### **Preparation of circular template DNA**

The circular template was prepared using a linear padlock probe, a primer and T4 DNA ligase. Briefly, 10 µL of 5'-phosphorylated padlock probe (100 µM) was hybridized with 20 µL of primer (100 µM) in 1× T4 ligase reaction buffer (40 mM Tris-HCl, 10 mM MgCl<sub>2</sub>, 10 mM DTT, 0.5 mM ATP, pH 7.8), followed by heating at 95 °C for 5 min and slowly cooling to 25 °C for 3 h. Subsequently, 10 µL of T4 DNA ligase was added and the mixture was incubated at 16 °C overnight. The ligase was inactivated by heating at 65 °C for 10 min. Finally, the circular DNA template was obtained by treating with 5 µL of exonuclease I (Exo I, 20 U/µL) in 1× Exo I buffer (67 mM glycine-KOH, 6.7 mM MgCl<sub>2</sub>, 1.0 mM DTT, pH 9.5) at 37 °C for 1.5 h to degrade the uncircularized padlock probes and excess primers, followed by heating at 80 °C for 15 min to inactivate Exo I.

### **Preparation of GOx-DFs**

The GOx-DFs were synthesized *via* RCA. A typical RCA reaction was carried out in 100 µL of solution containing a circular DNA template (0.36 µM), phi29 DNA polymerase (0.5 U/µL), dNTPs (1.0 mM), and GOx (24 µM) in buffer (33 mM Tris-acetate, 10 mM Mg(CH<sub>3</sub>COO)<sub>2</sub>, 66 mM CH<sub>3</sub>COOK, 1% Tween 20, 1 mM DTT, pH 7.9) at 30 °C for 30 h. The RCA reaction was terminated by heating at 65 °C for 10 min. The RCA products were washed with ultrapure water three times by centrifugation at 8000 rpm for 10 min. The resulting HRP-DFs were re-dispersed in ultrapure water and stored at 4 °C before use.

### **Preparation of Apt15-immobilized MMPs**

Magnetic microparticles (MMPs) (10 µL, 10 mg/mL) were washed three times with washing buffer and diluted to 1 mg/mL. biotin-modified thrombin aptamer Apt15 (10 µL, 100 µM) was added to the diluted MMPs solution and mixed for 120 min at room temperature, followed by magnetic separation

of the capture-labeled MMPs. The obtained capture-MMPs complexes were washed twice with a washing solution.

## PARTIAL RESULTS AND DISCUSSION

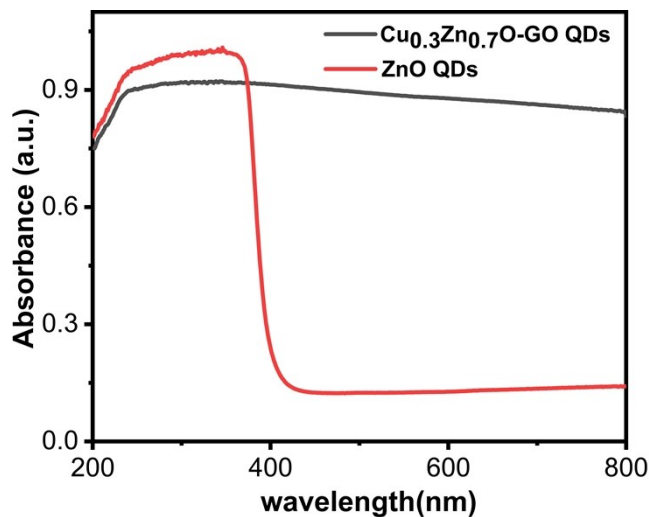

**Fig. S1** UV-vis diffuse reflectance spectra of ZnO QDs and Cu<sub>0.3</sub>Zn<sub>0.7</sub>O-GO QD

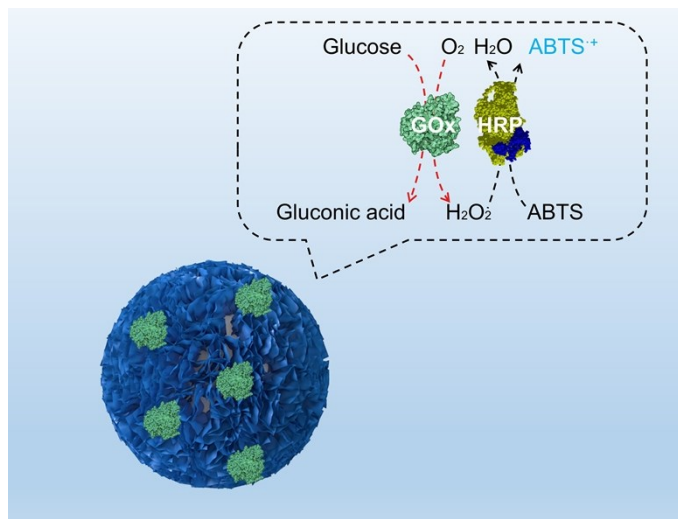

**Fig. S2** Schematic illustration of enzyme catalytic reaction in the GOx-DFs. GOx catalyzes the oxidation of glucose to form gluconic acid and in situ generates H<sub>2</sub>O<sub>2</sub>. The generated H<sub>2</sub>O<sub>2</sub> can oxidize ABTS to ABTS<sup>•+</sup> with HRP as the catalyst. The generated ABTS<sup>•+</sup> can be detectable at 415 nm by using a UV-vis spectrophotometer. Because the amount of ABTS conversion and glucose consumption are positively correlated with the change of absorbance, the detected absorbance can be used to represent the catalytic performance of this enzyme system.

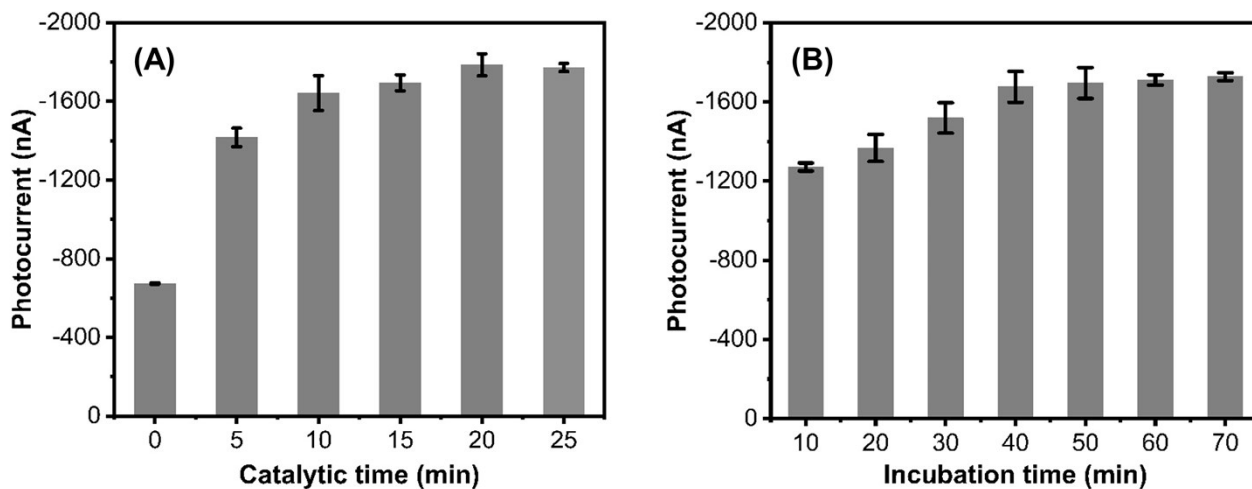

**Fig. S3** Effects of (A) the catalytic time of GOx-DFs, and (B) incubation time on the photocurrent of the Cu<sub>0.3</sub>Zn<sub>0.7</sub>O-GO QDs electrode in PBS (3000 fM thrombin used in this case).

**Table S1** Determination of thrombin added in human serum with the PEC biosensor.

| Serum samples | Added thrombin (fM) | Found thrombin (fM, n=3) | Relative standard deviation (RSD; %) | Recovery (%) |
|---------------|---------------------|--------------------------|--------------------------------------|--------------|
| 1             | 50.00               | 51.68                    | 2.2                                  | 103.4        |
| 2             | 100.00              | 100.35                   | 2.6                                  | 100.4        |
| 3             | 500.00              | 499.93                   | 0.4                                  | 100.0        |
| 4             | 1000.00             | 1035.34                  | 3.3                                  | 103.5        |
| 5             | 10000.00            | 9977.76                  | 5.6                                  | 99.8         |

| Transduced signal                                                                         | Dynamic range                    | LOD      | Ref.      |
|-------------------------------------------------------------------------------------------|----------------------------------|----------|-----------|
| Metal organic framework-based electrochemiluminescence biosensor                          | 1 - 10000 fM                     | 0.02 aM  | 1         |
| GOx/HRP DNA nanoflowers-based electrochemical biosensor                                   | 15 – 10 <sup>8</sup> fM          | 12.77 fM | 2         |
| Aptamer hydrogel-functionalized metamaterial-based molecule-specific terahertz biosensors | 0.5 – 500 pM                     | 0.40 pM  | 3         |
| Dual-recognition colorimetric aptasensor                                                  | 108.1 - 2.7 × 10 <sup>7</sup> pM | 27.8 pM  | 4         |
| Smart nanostructure-based self-powered biosensor                                          | 0.6 - 142.9 pM                   | 0.2 pM   | 5         |
| Photo-induced enhanced Raman spectroscopy-based detection platform                        | 50 - 1 × 10 <sup>6</sup> pM      | 50 pM    | 6         |
| PEC biosensing strategy                                                                   | 50-1000 fM                       | 29 fM    | This work |

on analytical properties.

## REFERENCE

1. Q. Huang, F. Luo, C. Lin, J. Wang, B. Qiu and Z. Lin, *Biosen. Bioelectron.*, 2021, **189**, 113374.
2. Y. Yan, Z. Qiao, X. Hai, W. Song and S. Bi, *Biosen. Bioelectron.*, 2021, **174**, 112827.
3. J. Zhou, X. Zhao, G. Huang, X. Yang, Y. Zhang, X. Zhan, H. Tian, Y. Xiong, Y. Wang and W. Fu, *ACS Sens.*, 2021, **6**, 1884-1890.
4. M. Shen, Y. Wang and X. Kan, *J. Mater. Chem. B*, 2021, **9**, 4249-4256.
5. Y. Wang, F. Wang, Z. Han, K. Huang, X. Wang, Z. Liu, S. Wang and Y. Lu, *Sens. Actuators, B*, 2020, **304**, 127418.

6. T. Man, W. Lai, M. Xiao, X. Wang, A. R. Chandrasekaran, H. Pei and L. Li, *Biosen. Bioelectron.*, 2020, **147**, 111742.
